# Supplementary material for: A systematic review and meta-analysis of the effects of inclusion of microalgae in dairy cows' diets on nutrient digestibility, fermentation parameters, blood metabolites, milk production, and fatty acid profiles
Source: Copernicus journal article supplement (doi:10.5194/aab-69-101-2026), 2026-02-10
Supplement: Supplementary file [file aab-69-101-2026-supplement.pdf]

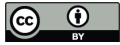

*Supplement of*

**A systematic review and meta-analysis of the effects of inclusion of microalgae in dairy cows' diets on nutrient digestibility, fermentation parameters, blood metabolites, milk production, and fatty acid profiles**

Soumaya Boukrouh et al.

*Correspondence to:* Soumaya Boukrouh (soumaya.boukrouh@um6p.ma, soumaya.boukrouh@gmail.com)

The copyright of individual parts of the supplement might differ from the article licence.

16 **Supplementary Table S1.** Summary of the studies included in the meta-analysis.

| Reference               | Country     | Number of animals | Animal breed      | Days in milk (days) | Experimental Duration (days) | Microalgae specie                                                        | Inclusion level (g/kg DM) |
|-------------------------|-------------|-------------------|-------------------|---------------------|------------------------------|--------------------------------------------------------------------------|---------------------------|
| Boeckaert et al., 2008  | Belgium     | 4                 | Holstein          | <90                 | <100                         | <i>Schizochytrium sp.</i>                                                | >100                      |
| Da Silva et al., 2016   | Brazil      | 20                | Holstein          | <90                 | <100                         | <i>Prototheca moriformis</i>                                             | 61-100                    |
| Huntington et al., 2020 | UK          | 20                | Holstein          | <90                 | <100                         | <i>Schizochytrium limacinum</i>                                          | <15                       |
| Fougère et al., 2018    | France      | 12                | Holstein          | <90                 | <100                         | <i>Schizochytrium sp.</i>                                                | 61-100                    |
| Franklin et al., 1999   | USA         | 30                | NR                | >90                 | 100-200                      | <i>Schizochytrium sp.</i>                                                | 31-60                     |
| Liu et al., 2020        | China       | 36                | Chinese-Holstein  | NR                  | NR                           | <i>Schizochytrium sp.</i>                                                | <15                       |
| Manzocchi et al., 2020  | Switzerland | 12                | NR                | >90                 | >200                         | <i>Arthrospira platensis</i>                                             | 31-60                     |
| Marques et al., 2019    | Brazil      | 24                | Holstein          | >90                 | 100-200                      | NR                                                                       | <15                       |
| Moran et al., 2017      | Italy       | 36                | Friesian          | >90                 | 100-200                      | <i>Aurantiochytrium limacinum</i>                                        | <15                       |
| Moran et al., 2018      | Italy       | 24                | Friesian          | >90                 | 100-200                      | <i>Aurantiochytrium limacinum</i>                                        | <15                       |
| Lamminen et al., 2017   | Finland     | 6 and 8           | Finnish Ayrshire  | >90                 | 100-200 and >200             | <i>Spirulina platensis</i> alone, and added to <i>Chlorella vulgaris</i> | 31-60                     |
| Lamminen et al., 2019   | Finland     | 8                 | Finnish Ayrshire  | >90                 | 100-200                      | <i>Spirulina platensis</i>                                               | 31-60                     |
| Lamminen et al., 2019   | Finland     | 4                 | Finnish Ayrshire  | >90                 | 100-200                      | <i>Spirulina platensis</i> , <i>Chlorella vulgaris</i> and their mix     | 61-100 and >100           |
| Póti et al., 2015       | Hungary     | 16                | Holstein-Friesian | >90                 | 100-200                      | <i>Chlorella kessleri</i> + <i>Spirulina platensis</i>                   | <15                       |

|                        |        |    |                   |     |         |                                 |       |
|------------------------|--------|----|-------------------|-----|---------|---------------------------------|-------|
| Till et al., 2019      | UK     | 60 | Holstein-Friesian | <90 | <100    | <i>Schizochytrium limacinum</i> | <15   |
| Till et al., 2020      | France | 32 | Holstein          | >90 | 100-200 | NR                              | 15-30 |
| Vanbergue et al., 2018 | France | 30 | Holstein          | >90 | <100    | NR                              | 15-30 |

NR not reported.

17

18
